# Supplementary material
Source: publisher site journal article supplement (https://e-cmh.org/upload/media/cmh-2022-0327-Supplementary-Fig-6.pdf)
Supplement: Supplementary file 1 [file cmh-2022-0327-Supplementary-Fig-6.pdf]

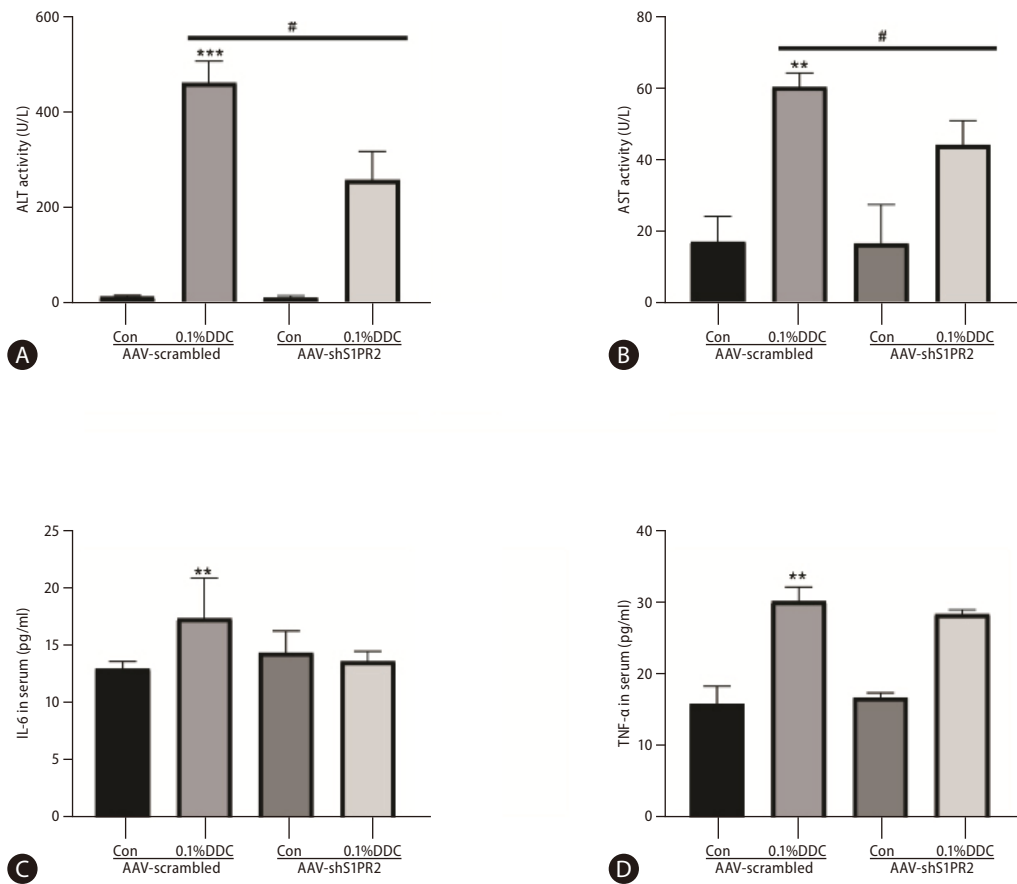

**Supplementary Figure 6.** S1PR2 knockdown obviously alleviates liver injury in cholestatic liver fibrosis mice. AST (A) and ALT (B) levels in serum of WT mice and S1PR2<sup>-/-</sup> mice. Pro-inflammatory factors including TNF- $\alpha$  (C), IL-6 (D) in serum on ELISA. S1PR2, sphingosine 1-phosphate receptor 2; DDC, 3,5-diethoxycarbonyl-1,4-dihydrocollidine; AST, aspartate aminotransferase; ALT, alanine aminotransferase. \*\*\* $P < 0.005$  compared with the control group. # $P < 0.05$  compared with the DDC model group.
